# Supplementary material for: Spike residue 403 affects binding of coronavirus spikes to human ACE2
Source: PubMed Central journal article supplement (PMC8617078; doi:10.1038/s41467-021-27180-0), 2021-11-25
Supplement: 41467_2021_27180_MOESM1_ESM.pdf [file 41467_2021_27180_MOESM1_ESM.pdf]

## Supplementary information for

# Spike residue 403 affects binding of coronavirus spikes to human ACE2

Fabian Zech<sup>1</sup>, Daniel Schniertshauer<sup>1</sup>, Christoph Jung<sup>2,3,4</sup>, Alexandra Herrmann<sup>5</sup>, Arne Cordsmeier<sup>5</sup>, Qinya Xie<sup>1</sup>, Rayhane Nchioua<sup>1</sup>, Caterina Prelli Bozzo<sup>1</sup>, Meta Volcic<sup>1</sup>, Lennart Koepke<sup>1</sup>, Janis Müller<sup>1</sup>, Jana Krüger<sup>6</sup>, Sandra Heller<sup>6</sup>, Steffen Stenger<sup>7</sup>, Markus Hoffmann<sup>8</sup>, Stefan Pöhlmann<sup>8</sup>, Alexander Kleger<sup>6</sup>, Timo Jacob<sup>2,3,4</sup>, Karl-Klaus Conzelmann<sup>8</sup>, Armin Ensser<sup>5</sup>, Konstantin M.J. Sparrer<sup>1</sup> and Frank Kirchhoff<sup>1\*</sup>

<sup>1</sup>Institute of Molecular Virology, Ulm University Medical Center, 89081 Ulm, Germany;

<sup>2</sup>Institute of Electrochemistry, Ulm University, 89081 Ulm, Germany; <sup>3</sup>Helmholtz-Institute Ulm (HIU) Electrochemical Energy Storage, Helmholtz-Straße 16, 89081 Ulm, Germany;

<sup>4</sup>Karlsruhe Institute of Technology (KIT), P.O. Box 3640, 76021 Karlsruhe, Germany; <sup>5</sup>Institute of Clinical and Molecular Virology, University Hospital Erlangen, Friedrich-Alexander Universität Erlangen-Nürnberg, 91054 Erlangen, Germany. <sup>6</sup>Department of Internal Medicine I, Ulm University Medical Center, 89081 Ulm, Germany; <sup>7</sup>Institute of Medical Microbiology and Hygiene, Ulm University Medical Centre, 89081 Ulm, Germany; <sup>8</sup>Infection Biology Unit, German Primate Center - Leibniz Institute for Primate Research, Göttingen, Germany; <sup>9</sup>Max von Pettenkofer-Institute of Virology, Medical Faculty, and Gene Center, Ludwig-Maximilians-Universität München, 81377 Munich, Germany.

\* Address Correspondence to: [Frank.Kirchhoff@uni-ulm.de](mailto:Frank.Kirchhoff@uni-ulm.de)

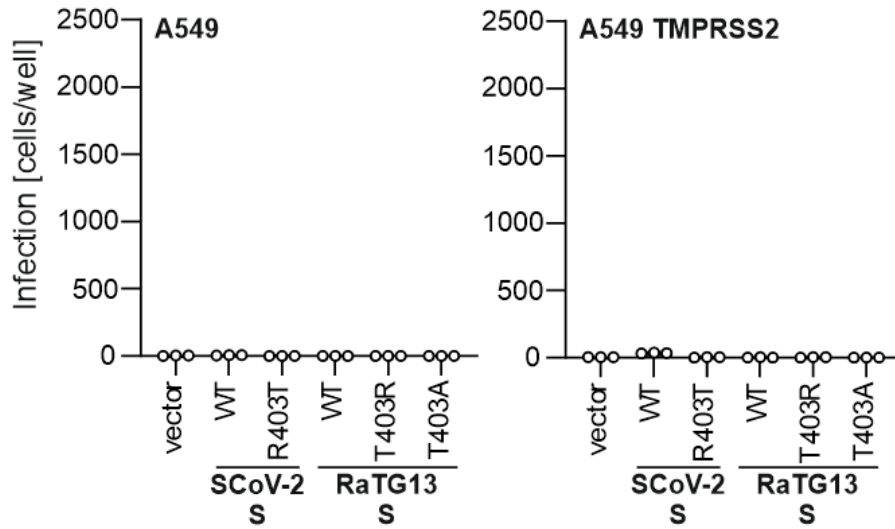

**Supplementary Figure 1. A549 and A549 TMPRSS2 are not permissive for SCoV2 or RaTG13 S mediated infection.** Automatic quantification of infection events of A549 and A549 TMPRSS2 expressing cells transduced with VSV $\Delta$ G-GFP pseudotyped with SARS-CoV-2, RaTG13 or indicated mutant S. Bars represent the mean of three independent experiments ( $\pm$ SEM). Related to Fig. 2.

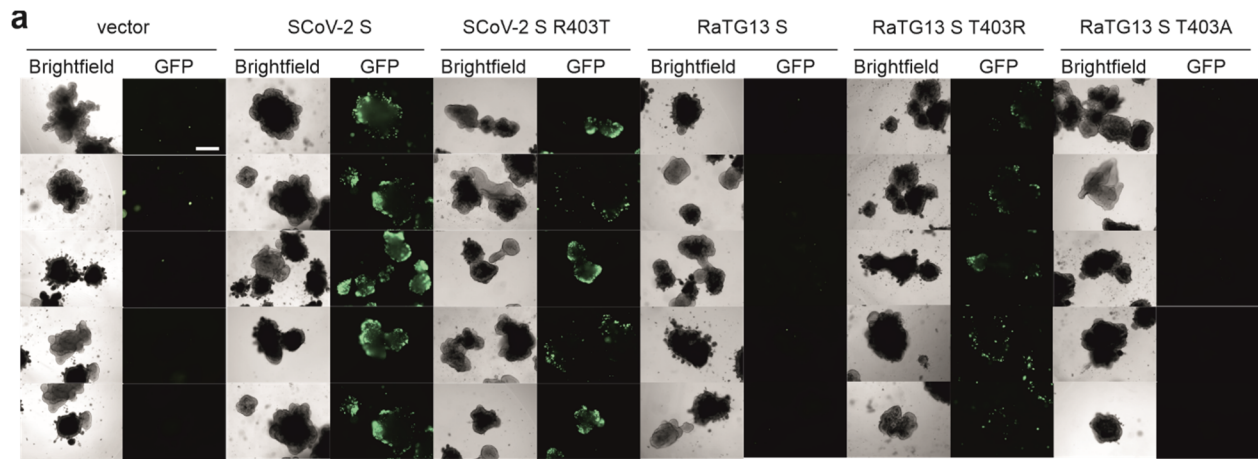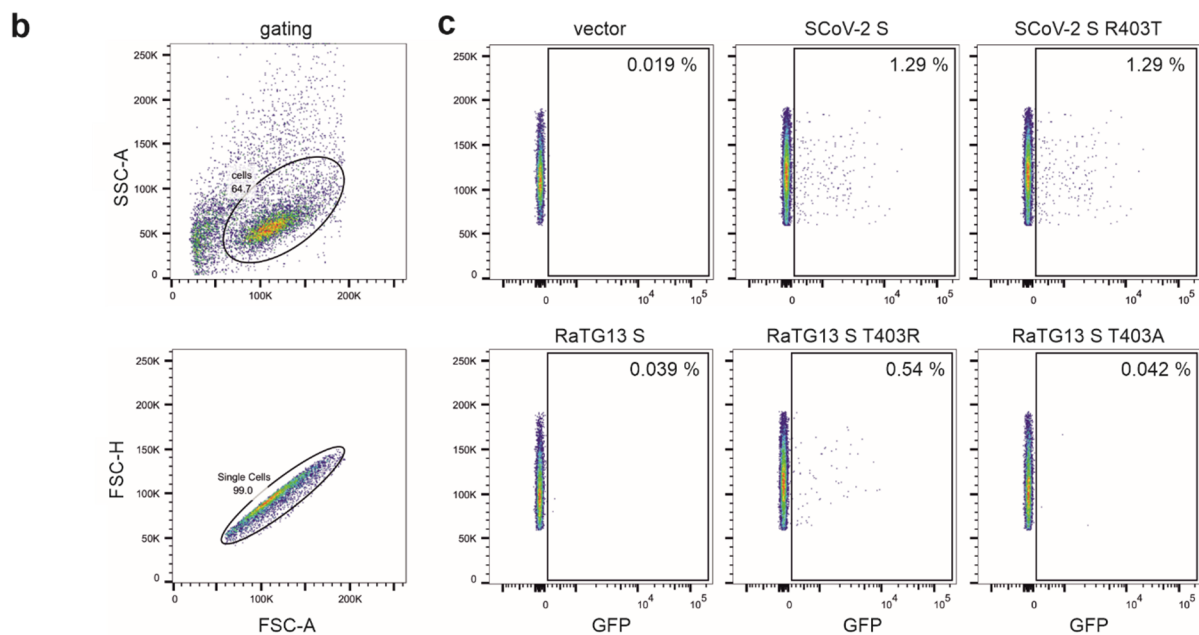

**Supplementary Figure 2. T403R allows RaTG13 S to mediate infection of human intestinal organoids.** **a**, Bright field and fluorescence microscopy (GFP) images of hPSC derived gut organoids infected with equal amounts of VSV $\Delta$ G-GFP (green) pseudotyped with SARS-CoV-2, RaTG13 or indicated mutant S (2 h). Scale bar, 250 $\mu$ m. Pictures represent one of the independent experiments quantified in Fig. 2d. **b**, Exemplary gating strategy of flow cytometry-based analysis of GFP-positive cells shown in panel a. Results of the quantitative analysis are provided in Fig. 2d.

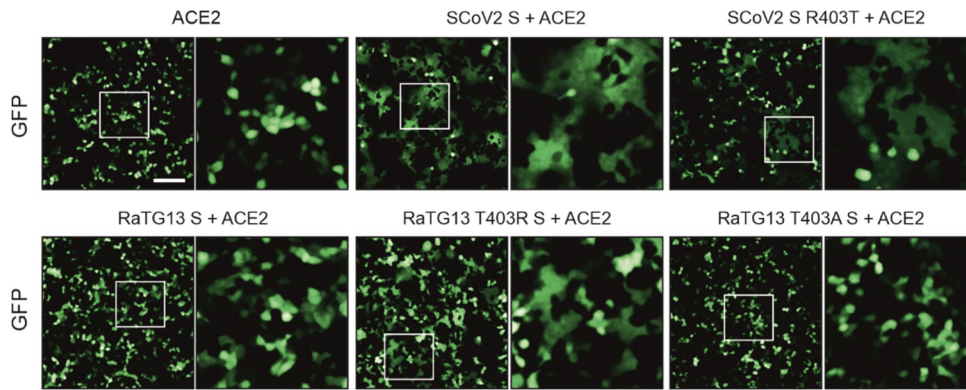

**Supplementary Figure 3. T403R RaTG13 S allows ACE2 dependent cell fusion.** Exemplary fluorescence microscopy images of HEK293T cells expressing SCoV2 S, RaTG13 S or the indicated mutant, Human ACE2 and GFP (green). Insets are indicated by white boxes. Scale bar, 125 $\mu$ m. The images represent a single experiment. Related to Fig. 2.

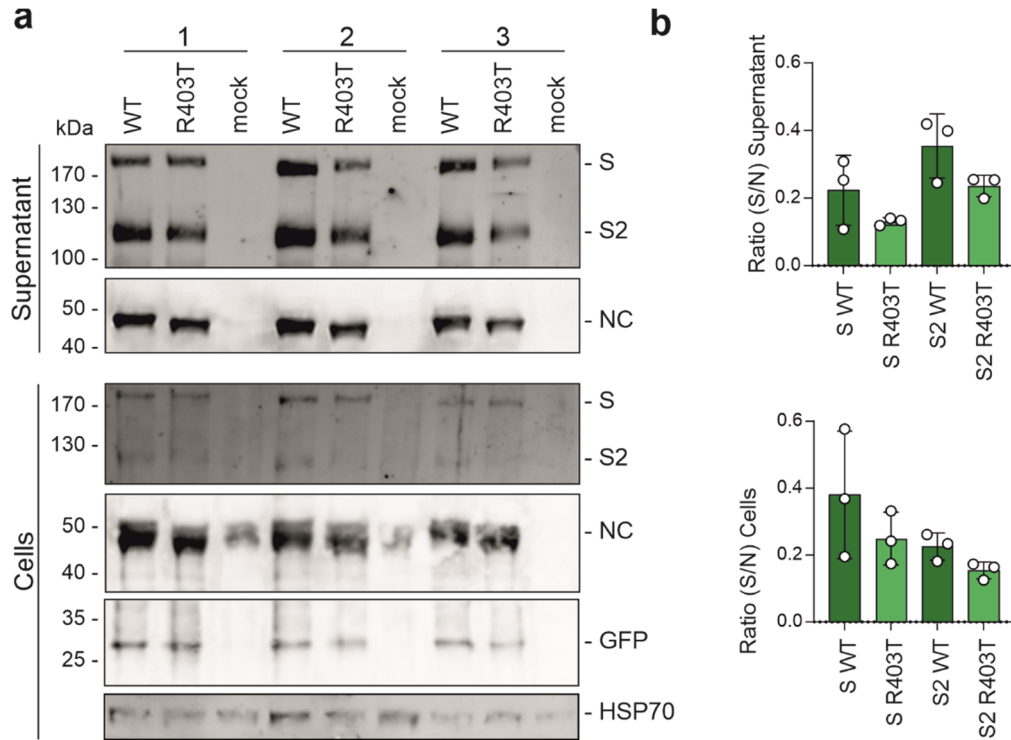

**Supplementary Figure 4. Expression of WT and R403T S proteins by replication-competent SARS-CoV-2.** **a**, Immunoblot of whole cells lysates (WCLs) and Supernatants of CaCo-2 cells infected with SARS-CoV-2 d6-YFP wild type or SARS-CoV-2 d6-YFP R403T. Blots were stained with anti-S, anti-N, anti-GFP and anti-HSP70 and quantified for Spike expression. n=3 (biological replicates). **b**, quantification of spike in the supernatant of SARS-CoV-2 d6-YFP wild type or SARS-CoV-2 d6-YFP R403T infected CaCo-2 cells. Bars represent the mean of three independent experiments ( $\pm$ SEM). Related to Fig. 2.

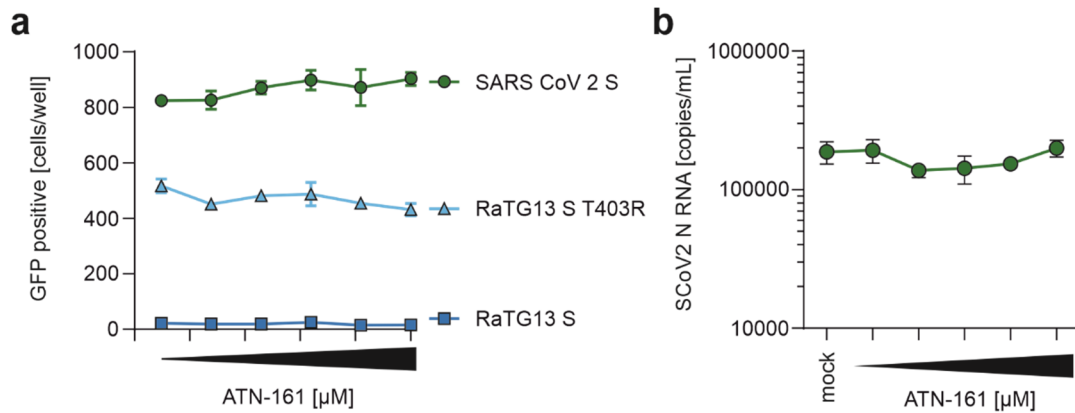

**Supplementary Figure 5. SARS-CoV-2 entry is independent of  $\alpha 5\beta 5$  integrin.** **a**, Automated quantification by GFP fluorescence of Caco-2 cells preincubated with indicated amounts of  $\alpha 5\beta 5$  integrin Inhibitor ATN-161 and infected with VSV $\Delta$ G-GFP pseudotyped with SARS-CoV-2, RaTG13 T403R mutant or RaTG13 S. Lines represent the mean of three independent experiments ( $\pm$ SEM). **b**, quantification of viral RNA copies in the supernatant of Calu-3 cells preincubated with indicated amounts of ATN-161 and infected SARS-CoV-2 (MOI 0.05, 6 h). Lines represent the mean of three independent experiments ( $\pm$ SEM).

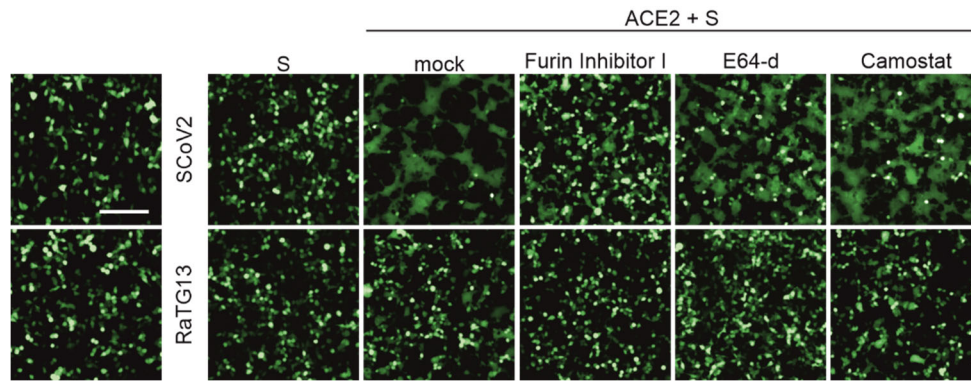

**Supplementary Figure 6. Furin Inhibitor I and E64d but not Camostat inhibit SCoV-2 and RaTG13 S induced syncytia formation.** Exemplary fluorescence microscopy images of HEK293T cells expressing SCoV2 S or RaTG13 S, Human ACE2 and GFP (green). The cells were incubated with the indicated protease inhibitor. The pictures represent a single experiment. Scale bar, 125 $\mu$ m. Related to Fig. 4.

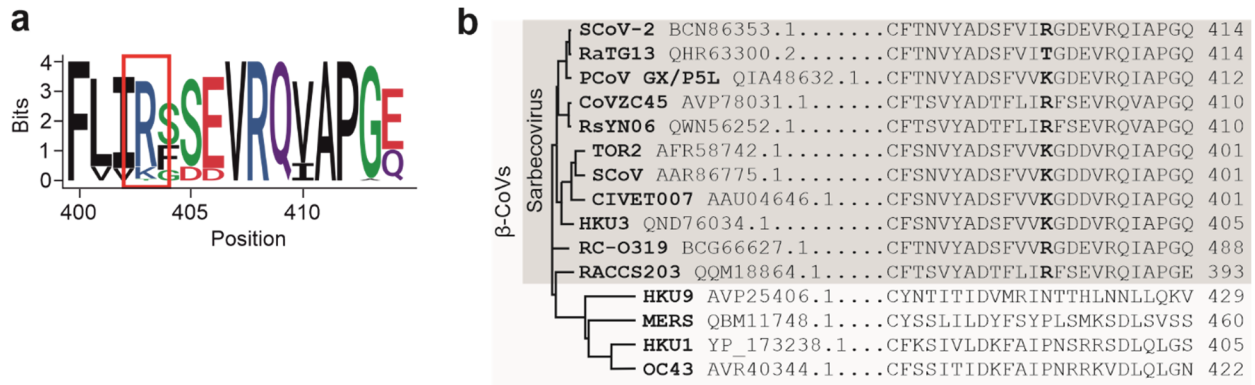

**Supplementary Figure 7. Conservation of R403 in  $\beta$ -Coronavirus Spike proteins. a,** Sequence logo of the alignment of 50 different Sarbecovirus Spike RBD sequences between sequence positions 400 and 414. Position R403 is highlighted by a red box. **b,** Primary sequence alignment of selected bat, pangolin and human coronaviruses. Position R403 is highlighted in bold.
