# Supplementary material for: Spike residue 403 affects binding of coronavirus spikes to human ACE2
Source: PubMed Central journal article supplement (PMC8617078; doi:10.1038/s41467-021-27180-0), 2021-11-25
Supplement: 41467_2021_27180_MOESM3_ESM.pdf [file 41467_2021_27180_MOESM3_ESM.pdf]

## Description of Additional Supplementary Files

File Name: Supplementary Data 1

Description: **Statistical calculations and P-values**

File Name: Supplementary Data 2

Description: **List of Primers**

File Name: Supplementary Movie 1

Description: Reactive molecular dynamic simulations of the interaction of SCoV-2 S R403 with Human ACE2 E37. Related to Fig. 1.

File Name: Supplementary Movie 2

Description: Reactive molecular dynamic simulations of the interaction of SCoV-2 S R403T mutant T403 with Human ACE2 E37. Related to Fig. 1.

File Name: Supplementary Movie 3

Description: Reactive molecular dynamic simulations of the interaction of RatG13 S T403 with Human ACE2 E37. Related to Fig. 1.

File Name: Supplementary Movie 4

Description: Reactive molecular dynamic simulations of the interaction of RatG13 T403R mutant R403 with Human ACE2 E37. Related to Fig. 1.
